# Supplementary material for: In Silico Evidence for Gluconeogenesis from Fatty Acids in Humans
Source: PLOS journal article supplement (doi:10.1371/journal.pcbi.1002116), 2011-07-21
Supplement: S1 (10.1371/journal.pcbi.1002116.s001) [file journal.pcbi.1002116.s001]

## Table S1: List of abbreviations

### List of reactions

| Reaction                       | Catalyzing enzymes                                                                                                                                                                                                                                                                                                                                                                                                                               |
|--------------------------------|--------------------------------------------------------------------------------------------------------------------------------------------------------------------------------------------------------------------------------------------------------------------------------------------------------------------------------------------------------------------------------------------------------------------------------------------------|
| Acat1                          | acetyl-Coenzyme A acetyltransferase 1 (acetoacetyl Coenzyme A thiolase)                                                                                                                                                                                                                                                                                                                                                                          |
| Acat2                          | acetyl-Coenzyme A acetyltransferase 2 (acetoacetyl Coenzyme A thiolase)                                                                                                                                                                                                                                                                                                                                                                          |
| Aco1                           | aconitase 1, soluble                                                                                                                                                                                                                                                                                                                                                                                                                             |
| Aco2                           | aconitase 2, mitochondrial                                                                                                                                                                                                                                                                                                                                                                                                                       |
| Adh                            | alcohol dehydrogenase IV<br>alcohol dehydrogenase V<br>alcohol dehydrogenase 1A (class I), alpha polypeptide<br>alcohol dehydrogenase IB (class I), beta polypeptide<br>alcohol dehydrogenase 1C (class I), gamma polypeptide<br>alcohol dehydrogenase 6 (class V)<br>alcohol dehydrogenase 7 (class IV), mu or sigma polypeptide<br>alcohol dehydrogenase, iron containing, 1 (liver)<br>alcohol dehydrogenase 1AB<br>alcohol dehydrogenase 1AC |
| Adh (con't)                    | alcohol dehydrogenase 1BC                                                                                                                                                                                                                                                                                                                                                                                                                        |
| Adh5                           | alcohol dehydrogenase V                                                                                                                                                                                                                                                                                                                                                                                                                          |
| Akr                            | aldo-keto reductase family 1, member A1<br>aldo-keto reductase family 1, member B1 (aldose reductase)<br>aldo-keto reductase family 7, member A2 (aflatoxin aldehyde reductase)                                                                                                                                                                                                                                                                  |
| Akr1b1                         | aldo-keto reductase family 1, member B1 (aldose reductase)                                                                                                                                                                                                                                                                                                                                                                                       |
| Akr7a2                         | aldo-keto reductase family 7, member A2 (aflatoxin aldehyde reductase)                                                                                                                                                                                                                                                                                                                                                                           |
| Aldh                           | aldehyde dehydrogenase 1 family, member A1<br>aldehyde dehydrogenase 1 family, member A2<br>aldehyde dehydrogenase 1 family, member A3<br>aldehyde dehydrogenase 3 family, member A1<br>aldehyde dehydrogenase 3 family, member A2<br>aldehyde dehydrogenase 3 family, member B1<br>aldehyde dehydrogenase 3 family, member B2<br>aldehyde dehydrogenase 7 family, member A1<br>aldehyde dehydrogenase 9 family, member A1                       |
| Aqp9                           | aquaporin 9                                                                                                                                                                                                                                                                                                                                                                                                                                      |
| Bpgm                           | 2,3-bisphosphoglycerate mutase                                                                                                                                                                                                                                                                                                                                                                                                                   |
| Crns<br>(Carnitine<br>shuttle) | Solute carrier family 25, carnitine/acylcarnitine translocase, member 20, mitochondrial<br>carnitine acetyltransferase, mitochondrial                                                                                                                                                                                                                                                                                                            |
| Cyp2e1                         | cytochrome P450, family 2, subfamily E, polypeptide 1                                                                                                                                                                                                                                                                                                                                                                                            |

| <b>Reaction</b> | <b>Catalyzing enzymes</b>                                                                                                                                                                                                                                                                                      |
|-----------------|----------------------------------------------------------------------------------------------------------------------------------------------------------------------------------------------------------------------------------------------------------------------------------------------------------------|
| Fbp             | fructose-1,6-bisphosphatase 1 (liver)<br>fructose-1,6-bisphosphatase 2 (muscle)                                                                                                                                                                                                                                |
| Flj32499        | hypothetical protein FLJ32499, mitochondrial                                                                                                                                                                                                                                                                   |
| Flj39207        | C219-reactive peptide                                                                                                                                                                                                                                                                                          |
| Glo1            | glyoxalase I                                                                                                                                                                                                                                                                                                   |
| Grhpr           | glyoxylate reductase/hydroxypyruvate reductase                                                                                                                                                                                                                                                                 |
| Hadha           | hydroxyacyl-Coenzyme A dehydrogenase/3-ketoacyl-Coenzyme A thiolase/enoyl-Coenzyme A hydratase (trifunctional protein), alpha subunit<br>hydroxyacyl-Coenzyme A dehydrogenase/3-ketoacyl-Coenzyme A thiolase/enoyl-Coenzyme A hydratase (trifunctional protein), beta subunit                                  |
| Hagh            | hydroxyacylglutathione hydrolase<br>hydroxyacylglutathione hydrolase-like                                                                                                                                                                                                                                      |
| Hmgcl           | 3-hydroxymethyl-3-methylglutaryl-Coenzyme A lyase<br>3-hydroxymethyl-3-methylglutaryl-Coenzyme A lyase-like 1, mitochondrial                                                                                                                                                                                   |
| Hmgcs1          | 3-hydroxy-3-methylglutaryl-Coenzyme A synthase 1 (soluble)                                                                                                                                                                                                                                                     |
| Hmgcs2          | 3-hydroxy-3-methylglutaryl-Coenzyme A synthase 2 (mitochondrial)                                                                                                                                                                                                                                               |
| Idh2            | isocitrate dehydrogenase 2 (NADP+), mitochondrial                                                                                                                                                                                                                                                              |
| Idh1            | isocitrate dehydrogenase 1 (NADP+), soluble                                                                                                                                                                                                                                                                    |
| Ireb2           | iron-responsive element binding protein                                                                                                                                                                                                                                                                        |
| Ldh             | lactate dehydrogenase A (liver, skeletal muscle)<br>lactate dehydrogenase B (heart, red blood cell)<br>lactate dehydrogenase C (testis)<br>lactate dehydrogenase A-like 6B (testis)<br>lactate dehydrogenase A-like 6A<br>lactate dehydrogenase (heart, red blood cell, brain, kidney, liver, skeletal muscle) |
| Ldha            | lactate dehydrogenase A (liver, skeletal muscle)                                                                                                                                                                                                                                                               |
| Ldhd            | lactate dehydrogenase D                                                                                                                                                                                                                                                                                        |
| Mdh1            | malate dehydrogenase 1 (NAD), soluble<br>malate dehydrogenase 1b (NAD), soluble                                                                                                                                                                                                                                |
| Me1             | malic enzyme 1, NADP(+)-dependent, cytosolic                                                                                                                                                                                                                                                                   |
| Oxct            | 3-oxoacid CoA transferase 1, mitochondrial<br>3-oxoacid CoA transferase 2, mitochondrial                                                                                                                                                                                                                       |
| Pc              | pyruvate carboxylase, mitochondrial (liver, kidney, intestine)                                                                                                                                                                                                                                                 |
| Pck1            | phosphoenolpyruvate carboxykinase 1, soluble (liver, kidney, intestine)                                                                                                                                                                                                                                        |
| Pck2            | phosphoenolpyruvate carboxykinase 2, mitochondrial (liver, kidney, intestine)                                                                                                                                                                                                                                  |
| Pgam            | brain phosphoglycerate mutase 1<br>muscle phosphoglycerate mutase 2                                                                                                                                                                                                                                            |
| Pgk             | phosphoglycerate kinase 1<br>phosphoglycerate kinase 2 (testis)                                                                                                                                                                                                                                                |
| Slc16a1         | solute carrier family 16 (monocarboxylic acid transporters), member 1                                                                                                                                                                                                                                          |

| Reaction | Catalyzing enzymes                                                              |
|----------|---------------------------------------------------------------------------------|
| Slc25a1  | solute carrier family 25 (mitochondrial carrier; citrate transporter), member 1 |
| Slc25a10 | solute carrier family 25 (dicarboxylate transporter) member 10, mitochondrial   |
| Uev      | ubiquitin-conjugating enzyme E2-like                                            |
| Zadh     | zinc binding alcohol dehydrogenase                                              |

List of reactions and catalyzing enzymes. In some cases several of the listed proteins are necessary to catalyze the reaction (for more information see the BiGG database, <http://bigg.ucsd.edu>).

#### Metabolites

| Abbreviation | Compound                   | Abbreviation | Compound                 |
|--------------|----------------------------|--------------|--------------------------|
| 12ppd-S      | (S)-propane-1,2-diol       | Lac-D        | D-lactate                |
| AaCoA        | acetoacetyl-CoA            | Lac-L        | L-lactate                |
| AcAc         | acetoacetate               | Lald-D       | D-lactaldehyde           |
| AcCoA        | acetyl-CoA                 | Lald-L       | L-lactaldehyde           |
| CoA          | coenzyme A                 | Lgt-S        | (R)-S-lactoylglutathione |
| DHAP         | dihydroxyacetone phosphate | Mal          | Malate                   |
| FDP          | fructose-1,6-bisphosphate  | Mthgxl       | methylglyoxal            |
| FicytC       | ferricytochrome c          | OAA          | Oxaloacetate             |
| FocytC       | ferrocycytochrome c        | OG           | Oxoglutarate             |
| G3P          | Glyceraldehyde 3-phosphate | Pyr          | pyruvate                 |
| G6P          | glucose-6 phosphate        | R5P          | ribose-5-phosphate       |
| Glc          | glucose                    | Ru5P         | ribulose-5-phosphate     |
| Gthrd        | reduced glutathione        | Succ         | succinate                |
| HmgCoA       | Hydroxymethylglutaryl-CoA  | SuccCoA      | Succinyl-CoA             |
| Icit         | Isocitrate                 | X5P          | xylulose-5-phosphate     |
